# Supplementary material for: Two-dimensional iron–tetracyanoquinodimethane (Fe–TCNQ) monolayer: an efficient electrocatalyst for the oxygen reduction reaction
Source: Royal Society of Chemistry journal article supplement (doi:10.1039/c6ra14339c), 2016-01-01
Supplement: c6ra14339c1.pdf [file c6ra14339c1.pdf]

## Supporting Information

### **Two-dimensional Iron-tetracyanoquinodimethane (Fe-TCNQ) Monolayer: an Efficient Electrocatalyst for the Oxygen Reduction Reaction**

Nan Wang,<sup>1</sup> Liyan Feng,<sup>1</sup> Yongchen Shang,<sup>1</sup> Jingxiang Zhao,<sup>1,\*</sup> Qinghai Cai,<sup>1</sup> Peng Jin<sup>2,\*</sup>

*<sup>1</sup>Key Laboratory of Photonic and Electronic Bandgap Materials, Ministry of Education, and College of Chemistry and Chemical Engineering, Harbin Normal University, Harbin, 150025, China*

*<sup>2</sup>School of Materials Science and Engineering, Hebei University of Technology, Tianjin, 300130, P. R. China*

\*To whom correspondence should be addressed. Email: xjz\_hmily@163.com (J. Z.); china.peng.jin@gmail.com (P. J.)

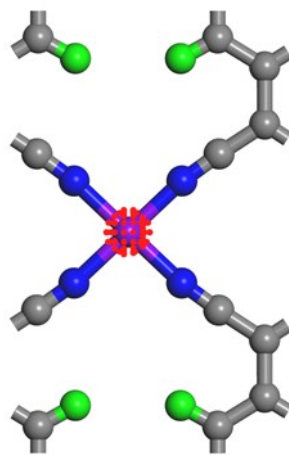

**Fig. S1** Spin-polarized density for Fe-TCNQ monolayer with isovalue of 0.01 electrons  $\text{\AA}^{-3}$ .

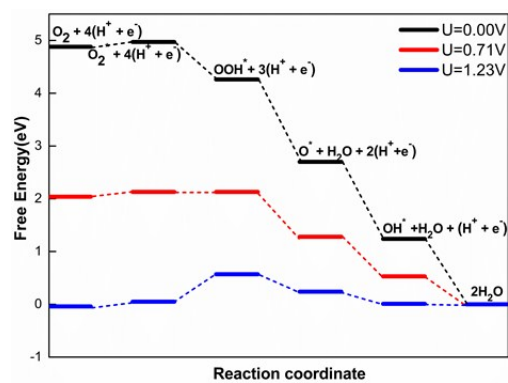

(a)

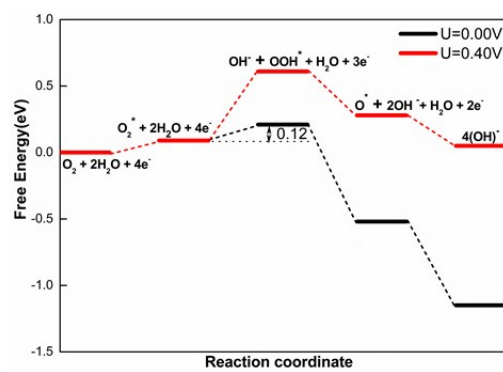

(b)

**Fig. S2** Free energy diagrams for the ORR on Br-Fe-TCNQ monolayer in (a) acidic and (b) alkaline media.
